# Supplementary material for: Changes in the National Cancer Institute’s R01 workforce: growth, aging, retention, and policy implications
Source: JCI journal article supplement (doi:10.1172/jci146925), 2021-03-31

Supplemental Figure 1. Years from MD or equivalent degree to first R01-equivalent award. Includes dental and veterinary degrees, as well as MD/PhDs. For recipients of MD/PhD degrees, the earlier degree is used to determine time to first award. The box plots show an overall increasing trend in time (median, in years) from degree to first R01-equivalent award from FY 1990 to 2016. The middle line denotes the median years, with the first (black) and third quartile (gray) marked.

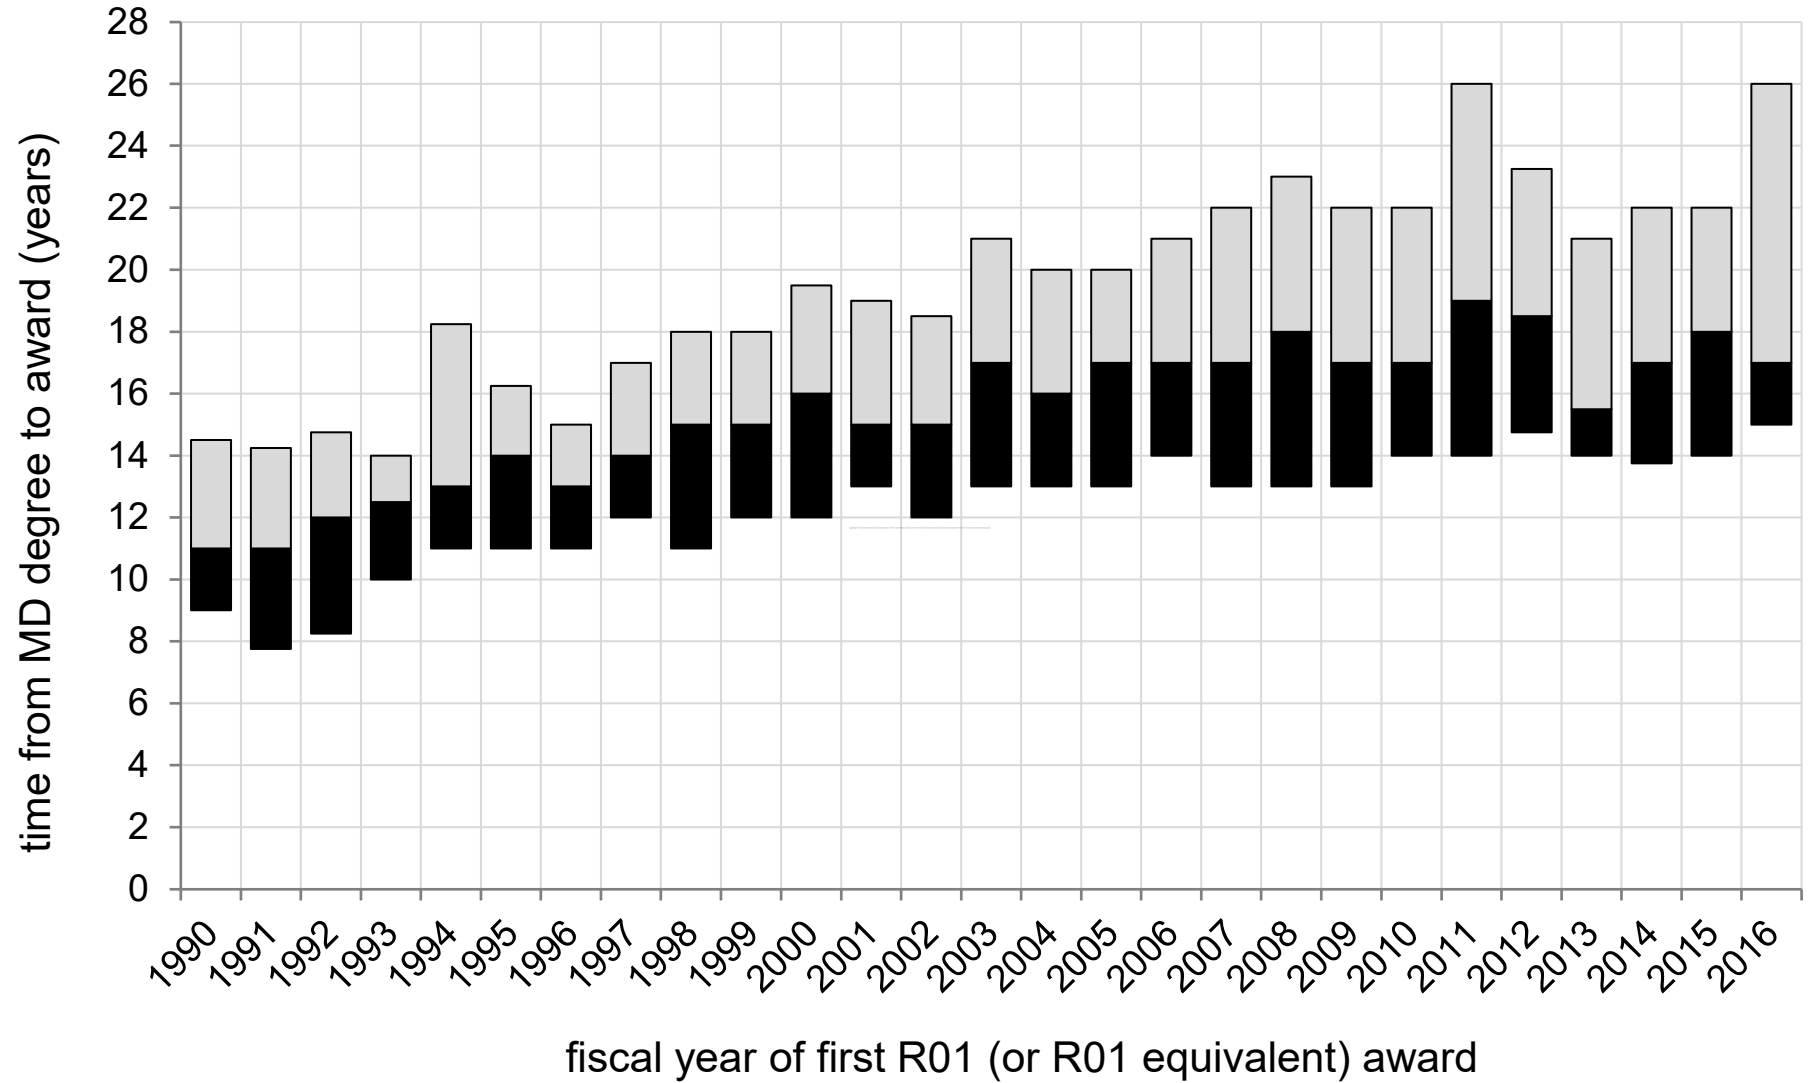

Supplemental Figure 2. Age of (future) NCI NIs at receipt of PhD degree year of first R01 (or R01 equivalent) Award. The middle line denotes the median age, with the first quartile in black and the third quartile in gray. The median age at PhD increased by at most two years during the examined timeframe.

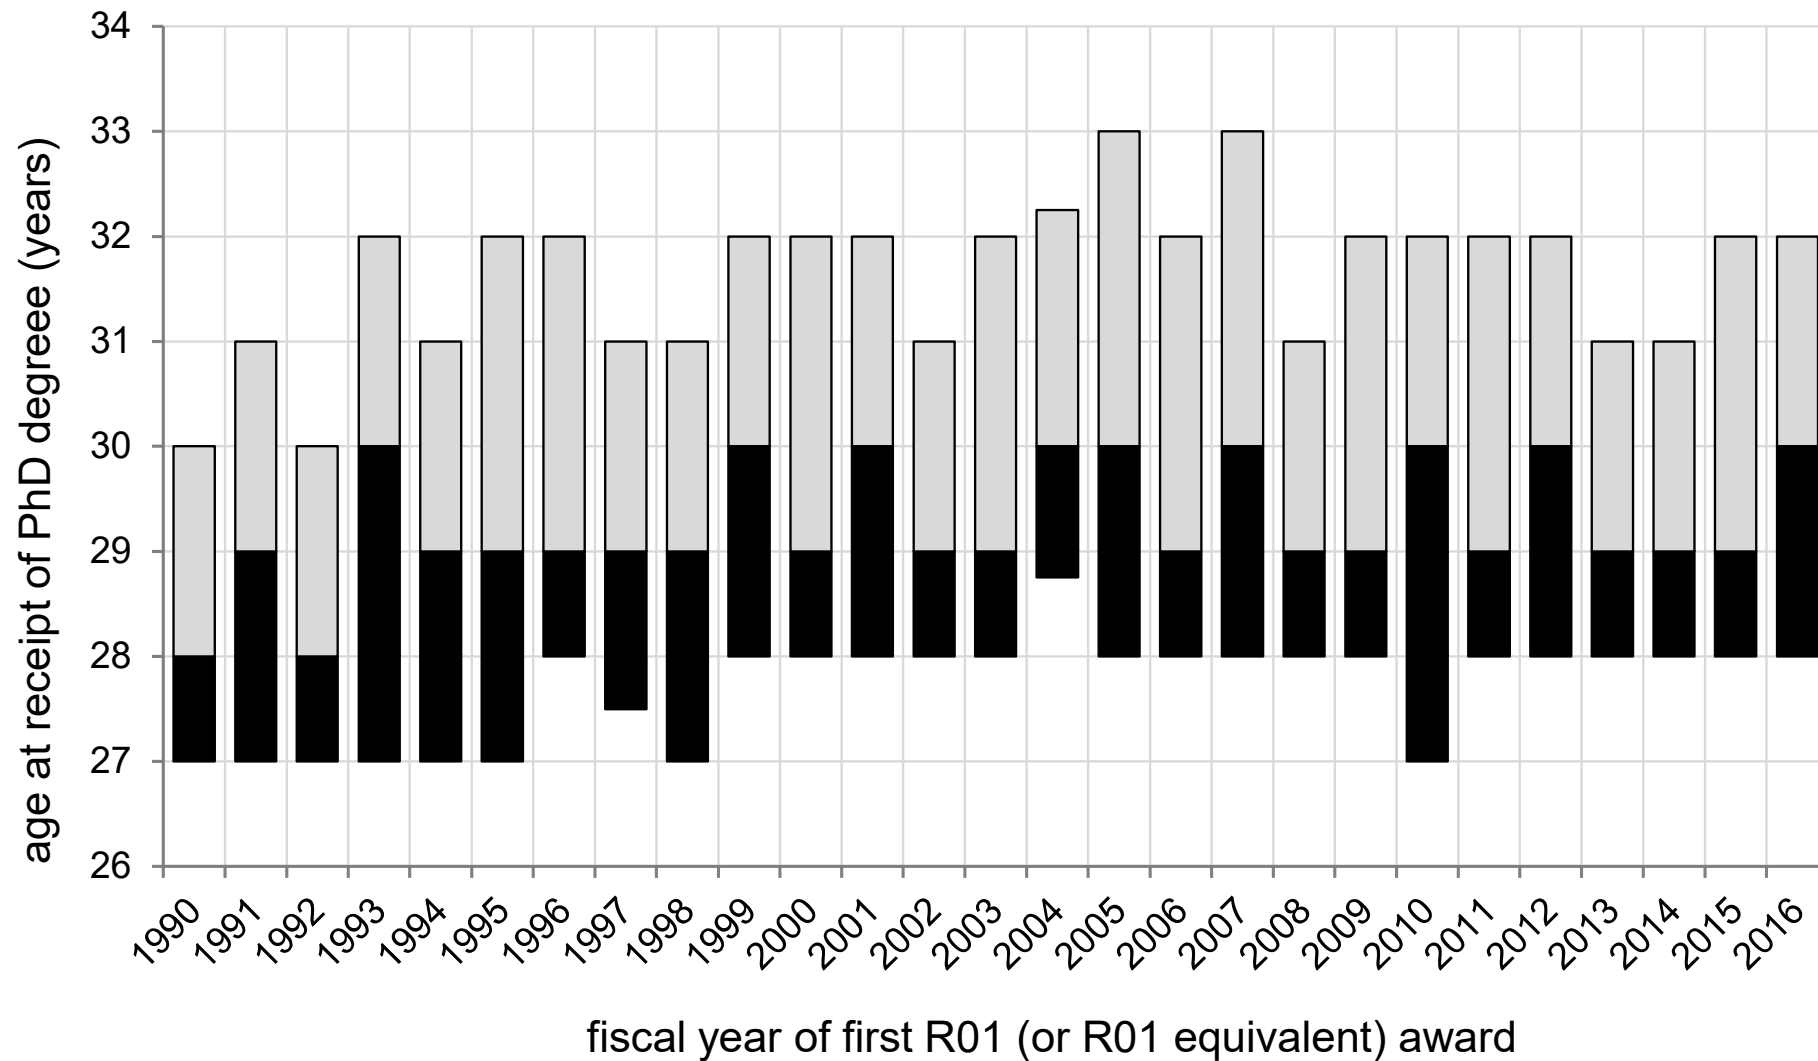

Supplemental Figure 3. Age at first R01 (or R01 equivalent) award for NIs increased substantially since the 1990s. The middle line denotes the median age, with the first quartile in black and the third quartile in gray.

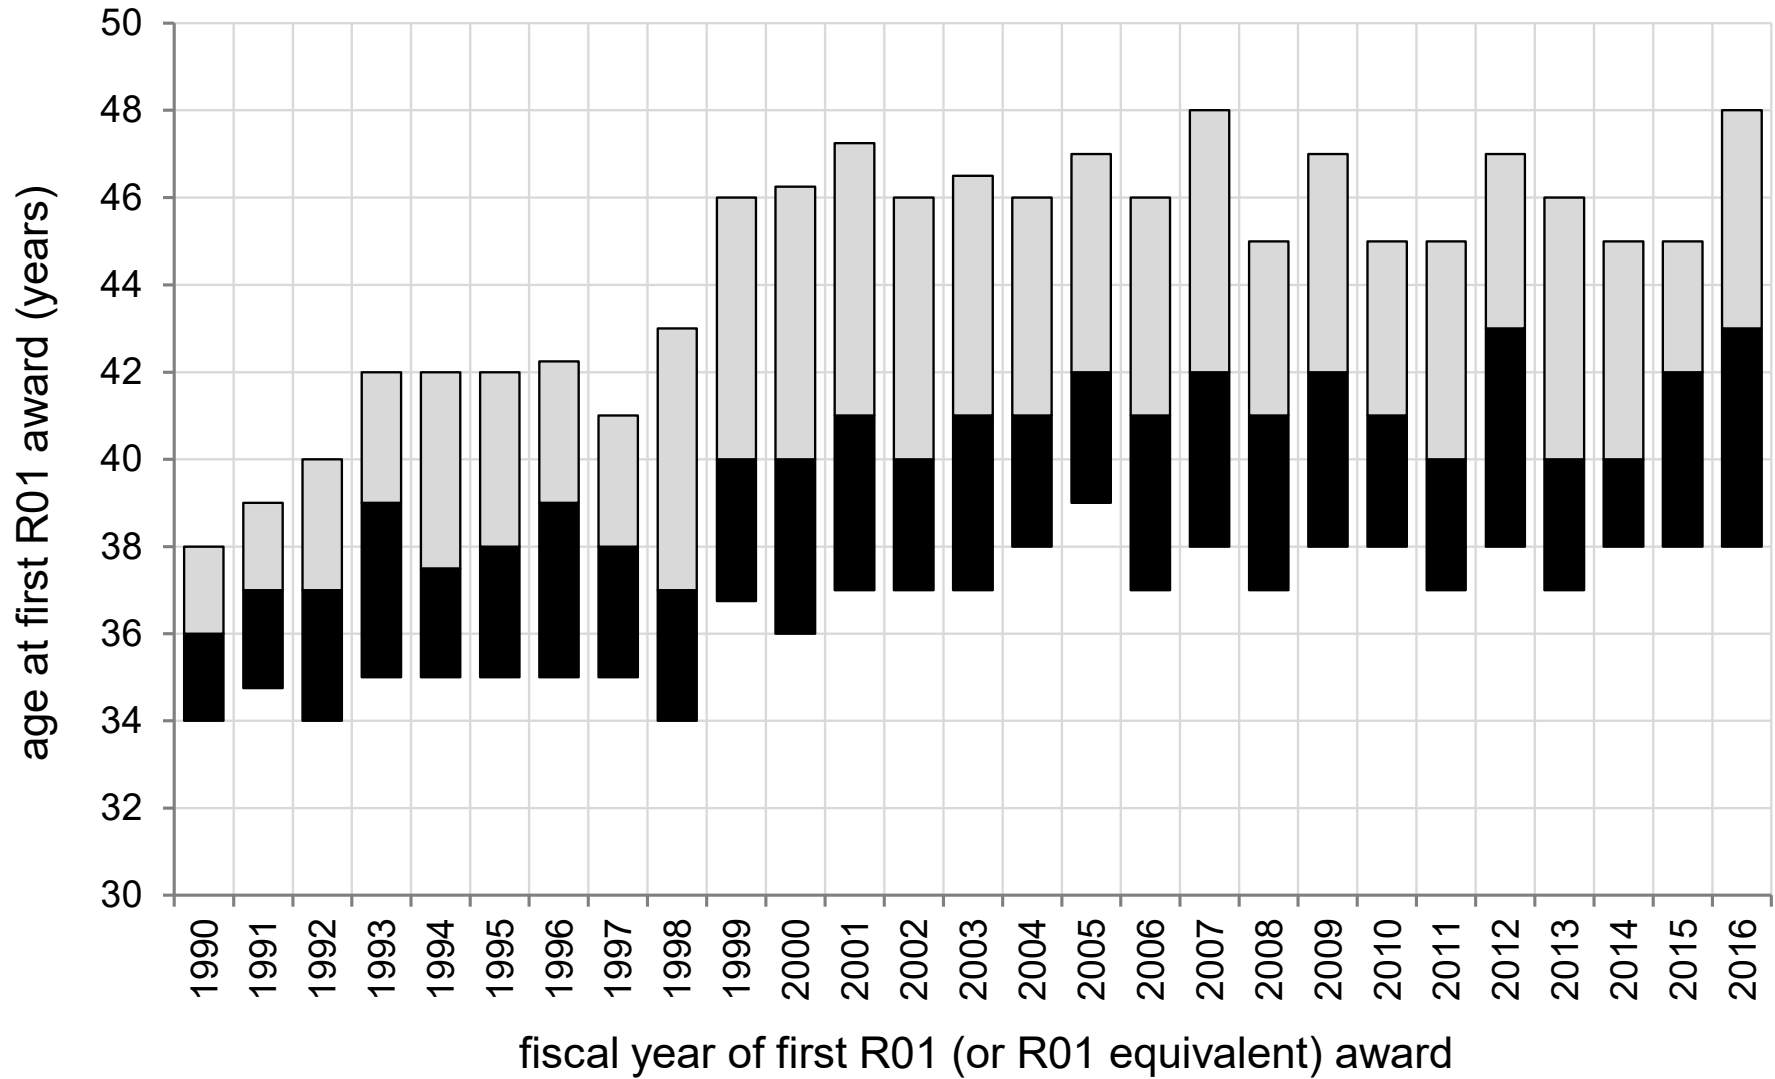

Supplement: sd1 [file 1]
